# Supplementary material
Source: PubMed Central journal article supplement (PMC7613801)
Supplement: EMS154636-supplement-Supplementary_Information.pdf [file EMS154636-supplement-Supplementary_Information.pdf]

**Supplementary Table 1. Similar phenotypes upon global depletion of all Elongator subunits in flies.**

Different Elongator subunits, as well as partners, were depleted in the whole fly using indicated RNAi construct and DaGal4 driver. Note that depletion of all elongator subunits lead to the same phenotype, as expected for multiprotein complexes. Also note that established partners of Elongator in other systems, CTU2 and Kti11/DPH3<sup>43,44</sup>, do not show the larva lethality phenotype characteristic of Elongator depletion. This might indicate that either the biochemical connection to Elongator is not conserved in flies, or that these proteins are too abundant for RNAi depletion to have a phenotype.

| Driver | Target            | Gene description              | RNAi line reference | Phenotype           |
|--------|-------------------|-------------------------------|---------------------|---------------------|
| daGal4 | <i>Elp1</i>       | Elongator subunit             | VDRC #109402        | lethal in L3 larvae |
| daGal4 | <i>Elp2</i>       | Elongator subunit             | VDRC #105393        | lethal in L3 larvae |
| daGal4 | <i>Elp3</i>       | Elongator subunit             | NIG #15433R-3       | lethal in L3 larvae |
| daGal4 | <i>Elp4</i>       | Elongator subunit             | VDRC #22460         | lethal in L3 larvae |
| daGal4 | <i>Elp5</i>       | Elongator subunit             | VDRC #20785         | lethal in Pupae     |
| daGal4 | <i>HSC70-4</i>    | Elongator associated protein  | BDSC 35684          | lethal in L3 larvae |
| daGal4 | <i>CTU1</i>       | Elongator downstream effector | VDRC #104409        | lethal in L3 larvae |
| daGal4 | <i>CTU2 #1</i>    | Elongator downstream effector | VDRC #52087         | viable              |
| daGal4 | <i>CTU2 #2</i>    | Elongator downstream effector | VDRC #100704        | viable              |
| daGal4 | <i>Kti11/DPH3</i> | Elongator downstream effector | VDRC #28517         | viable              |

**Supplementary Table 2. Rescue ability of the different constructs used in this study.**

The ability of the indicated RNAi-resistant Elp3\* constructs to rescue the characteristic phenotype of Elp3 depletion in the whole fly was assessed. Note that both Elp3\* and GFP-Elp3\* can rescue the phenotype, on the contrary to Elp3\*-YY531AA, which abolishes the enzymatic activity of Elp3. Also that Elp3 Y531F is able to rescue the phenotype, while it was proposed to be dominant negative in flies<sup>42</sup>. This might suggest that this allele is a hypomorph rather than an amorph allele in this specific assay.

| Driver | Rnai            | Rescue construct | Phenotype    |
|--------|-----------------|------------------|--------------|
|        |                 |                  | lethal in L3 |
| daGal4 | <i>Elp3RNAi</i> | none             | larvae       |
| daGal4 | <i>Elp3RNAi</i> | Elp3*            | viable       |
| daGal4 | <i>Elp3RNAi</i> | GFP-Elp3*        | viable       |
| daGal4 | <i>Elp3RNAi</i> | Elp3* Y531F      | viable       |
|        |                 |                  | lethal in L3 |
| daGal4 | <i>Elp3RNAi</i> | Elp3* YY531AA    | larvae       |
